# Supplementary material
Source: publisher site journal article supplement (https://www.kjim.org/upload/media/kjim-2024-399-Supplementary-Table-1.pdf)
Supplement: Supplementary file 1 [file kjim-2024-399-Supplementary-Table-1.pdf]

**Supplementary Table 1. Definition of the clinical outcome in the current study**

| Clinical outcome                | Definition                                                                                                                                                                                                                                                                                                                                                                                                                                                                                                                                            |
|---------------------------------|-------------------------------------------------------------------------------------------------------------------------------------------------------------------------------------------------------------------------------------------------------------------------------------------------------------------------------------------------------------------------------------------------------------------------------------------------------------------------------------------------------------------------------------------------------|
| Cardiac death                   | Defined as any death due to myocardial infarction, sudden cardiac death including unwitnessed death, heart failure, stroke, cardiovascular procedure-related complications, cardiovascular hemorrhage, and any case of death in which a cardiac cause could not be excluded as adjudicated by a blinded clinical endpoint committee                                                                                                                                                                                                                   |
| All-cause death                 | All-cause mortality was regarded as cardiac death unless a definite non-cardiac cause could be identified.                                                                                                                                                                                                                                                                                                                                                                                                                                            |
| Myocardial infarction           | Defined as symptom of myocardial ischemia, new ischemic electrocardiographic changes, development of pathological Q waves, imaging evidence of new loss of viable myocardium or new regional wall motion abnormality in a pattern consistent with an ischemic etiology, or identification of a coronary thrombus by angiography or autopsy, combined with a cardiac troponin level greater than the 99th percentile of the upper normal limit according to the fourth universal definition of myocardial infarction                                   |
| Stent thrombosis                | Defined as definite or probable stent thrombosis according to the Academic Research Consortium definition                                                                                                                                                                                                                                                                                                                                                                                                                                             |
| Stroke                          | Defined as an acute cerebrovascular event resulting in a neurologic deficit within 24 hours or the presence of acute infarction demonstrated by imaging studies                                                                                                                                                                                                                                                                                                                                                                                       |
| Target vessel revascularization | Defined as a repeat percutaneous coronary intervention or bypass surgery of the target vessel with either of the following indications: (1) percent diameter stenosis $\geq 50\%$ with a positive history of recurrent angina pectoris presumably related to the target vessel, objective signs of ischemia at rest or during exercise test presumably related to the target vessel, or abnormal results of any invasive functional diagnostic test or (2) percent diameter stenosis $\geq 70\%$ even in the absence of symptoms or signs of ischemia |
| Major bleeding                  | Adjudicated according to the bleeding academic research consortium (BARC) classification (BARC type 3 or 5)                                                                                                                                                                                                                                                                                                                                                                                                                                           |
